# Supplementary material
Source: PubMed Central journal article supplement (PMC8323986)
Supplement: NIHMS1724825-supplement-1.pdf [file NIHMS1724825-supplement-1.pdf]

**Supplemental table 1. Comparison of postoperative complications between the open and MIS group with adjustment by univariable and multivariable logistic regression analysis**

|                                                        | Univariate |           |         | Multivariate |           |         |
|--------------------------------------------------------|------------|-----------|---------|--------------|-----------|---------|
|                                                        | OR         | 95% CI    | p       | OR           | 95% CI    | p       |
| MIS approach                                           | 0.54       | 0.39–0.75 | < 0.001 | 0.70         | 0.49–1.00 | 0.049   |
| Age > 60 years                                         | 1.25       | 0.92–1.71 | 0.156   |              |           |         |
| Female sex                                             | 0.76       | 0.56–1.03 | 0.076   | 0.95         | 0.68–1.31 | 0.735   |
| BMI >26 kg/m <sup>2</sup>                              | 2.01       | 1.47–2.74 | < 0.001 | 1.83         | 1.31–2.56 | < 0.001 |
| ASA status III or IV (vs. I or II)                     | 1.54       | 1.10–2.14 | 0.012   | 1.51         | 1.04–2.18 | 0.029   |
| Any comorbidity                                        | 1.02       | 0.76–1.38 | 0.889   |              |           |         |
| Year of surgery                                        |            |           |         |              |           |         |
| 2007-2010                                              | 1          |           |         | 1            |           |         |
| 2011-2014                                              | 0.87       | 0.62–1.23 | 0.425   | 0.82         | 0.56–1.20 | 0.299   |
| 2015-2017                                              | 0.53       | 0.35–0.80 | 0.002   | 0.52         | 0.34–0.81 | 0.004   |
| Total or proximal gastrectomy (vs. Distal gastrectomy) | 3.33       | 2.44–4.54 | < 0.001 | 3.19         | 2.30–4.43 | < 0.001 |
| D2/D3 dissection (vs. D1/D1+)                          | 0.86       | 0.53–1.39 | 0.530   |              |           |         |
| Tumor > 3 cm                                           | 1.3        | 0.96–1.76 | 0.092   | 1.14         | 0.82–1.58 | 0.436   |
| Neoadjuvant chemotherapy                               | 1.14       | 0.84–1.54 | 0.413   |              |           |         |

BMI, body mass index; MIS, minimally invasive surgery; ASA, American Society of Anesthesiologists
